# Supplementary material
Source: HighWire-hosted journal article supplement (https://www.cmajopen.ca/highwire/filestream/80969/field_highwire_adjunct_files/3/open-2014-0075-reporting-checklist.pdf)
Supplement: open-2014-0075-reporting-checklist.pdf [file open-2014-0075-reporting-checklist.pdf]

## CONSORT checklist

### Title and Abstract

#### 1a. Title

Identification as a mixed method's pilot study

#### 1b. Abstract

Structured summary of study design, methods, results, and conclusions

### Introduction

#### 2a. Background

Scientific background and explanation of rationale

#### 2b. Objectives

Specific objectives or hypotheses

### Methods

#### 3a. Study Design

Description of trial design (pilot slide test, online survey)

#### 4a. Participants

Pilot slide examination was restricted to residents in their final years of training (PGY4,PGY5)

#### 4b. Study settings

Test was performed in seven centres across Canada

#### 5. Interventions

The interventions for each group with sufficient details to allow replication

#### 6a. Outcomes

The results of both glass and digital slides were comparable

#### 7a. Sample size

The sample size represents the actual number of senior residents available in that year

#### 7b. Interim analyses and stopping guidelines

#### 8. Randomisation

Who generated the allocation sequence, who enrolled participants, and who assigned participants to interventions

#### 9. Blinding :

Evaluator was blinded to the results

#### 10. Statistical methods

Statistical analyses were conducted with SPSS for windows, version 20. The effects of group A slides versus group B slides and glass versus digital formats were assessed using a two factor ANOVA (factor 1=glass versus digital, factor 2 = group A slides versus group B slides).

Estimated marginal means are presented to show the independent contributions of these two factors.

#### 11.Results

#### 12. Participant Flow

#### 13. Losses and exclusions

For each group, losses and exclusions after randomization, together with reasons

#### 14. Numbers analyzed

#### 15. Outcomes and estimation

results for each group, and the estimated effect size and its precision (such as 95% confidence interval)

16. Binary outcomes

17. Discussion

18. Limitations

Trial limitations

19. Generalizability

Generalizability (external validity, applicability) of the study findings

20. Interpretation
